# Supplementary material for: Therapeutic Effects of Naringin in Rheumatoid Arthritis: Network Pharmacology and Experimental Validation
Source: Front Pharmacol. 2021 May 14;12:672054. doi: 10.3389/fphar.2021.672054 (PMC8160516; doi:10.3389/fphar.2021.672054)
Supplement: Supplementary file 2 [file Table4.XLS]

## Sheet: Sheet1
name	BetweennessCentrality	ClosenessCentrality	DegreeCentrality	AverageShortestPathLength	Betweenness	ClusteringCoefficient	NeighborhoodConnectivity	Radiality	Stress	TopologicalCoefficient
IL6	0.111419	0.555556	40	1.8	810.358	0.307692	16.55	0.911111	5644	0.223649
MAPK8	0.085039	0.53125	34	1.88235	593.656	0.31016	16.5294	0.901961	4010	0.22643
MMP9	0.101469	0.524691	31	1.90588	557.761	0.35914	18	0.899346	4300	0.246133
TNF	0.0437121	0.524691	31	1.90588	330.89	0.406452	18.7742	0.899346	2798	0.253705
IL1B	0.048981	0.515152	29	1.94118	208.034	0.396552	18.7586	0.895425	2686	0.256967
MAPK1	0.0597231	0.52795	28	1.89412	267.139	0.428571	19.4643	0.900654	3378	0.266634
JUN	0.0324559	0.505952	27	1.97647	208.383	0.424501	19.4444	0.891503	2408	0.270062
CXCL8	0.0249864	0.502959	27	1.98824	186.574	0.467236	19.5556	0.890196	1636	0.27543
EGFR	0.0408777	0.502959	26	1.98824	221.53	0.378462	18.6154	0.890196	2338	0.258547
FOS	0.0228563	0.491329	22	2.03529	150.291	0.47619	21	0.884967	1456	0.287671
LEP	0.0497526	0.488506	22	2.04706	328.938	0.398268	17.9091	0.88366	2540	0.252241
FGF2	0.0333601	0.472222	22	2.11765	366.843	0.372294	17.6364	0.875817	2052	0.267218
RELA	0.0223299	0.491329	21	2.03529	141.839	0.457143	20.381	0.884967	1446	0.279191
PPARG	0.0408989	0.482955	21	2.07059	268.917	0.442857	19.0476	0.881046	2184	0.272109
CCND1	0.0623288	0.497076	20	2.01176	303.561	0.468421	20.35	0.887582	3952	0.28662
ESR1	0.046113	0.497076	20	2.01176	233.447	0.389474	18.2	0.887582	2382	0.252778
PTGS2	0.0314441	0.482955	20	2.07059	215.25	0.531579	22.25	0.881046	1430	0.317143
CASP3	0.0533761	0.5	19	2	230.613	0.368421	18.6316	0.888889	2690	0.255227
SMAD3	0.0521936	0.491329	17	2.03529	166.665	0.257353	16.1176	0.884967	2060	0.228571
TNFSF11	0.0146069	0.456989	17	2.18824	104.856	0.514706	20	0.867974	758	0.3125
PIK3R1	0.0323489	0.442708	17	2.25882	183.316	0.272059	13.8824	0.860131	1330	0.235294
CXCL12	0.00941225	0.452128	15	2.21176	273.91	0.533333	20.8	0.865359	674	0.325
ADIPOQ	0.0102289	0.418719	15	2.38824	78.5613	0.485714	17.6667	0.845752	770	0.304598
IRS1	0.00789353	0.452128	14	2.21176	166.631	0.494505	20.5714	0.865359	534	0.311688
TIMP1	0.00830021	0.440415	14	2.27059	52.0942	0.428571	17.2143	0.858824	430	0.286905
SERPINE1	0.00404573	0.456989	13	2.18824	32.5072	0.589744	23.6923	0.867974	438	0.348416
CASP8	0.0101236	0.438144	13	2.28235	66.3003	0.423077	17.3846	0.857516	538	0.288462
NFKBIA	0.00770388	0.435897	13	2.29412	13.4917	0.576923	21.0769	0.856209	382	0.351282
IFNG	0.0068354	0.431472	13	2.31765	15.5504	0.576923	22.7692	0.853595	360	0.361416
MMP13	0.00410324	0.427136	13	2.34118	30.2151	0.641026	21.7692	0.85098	272	0.356873
CXCR4	0.00656946	0.418719	13	2.38824	195.048	0.538462	19.6923	0.845752	440	0.333768
MMP1	0.00091545	0.447368	12	2.23529	6.91453	0.80303	26.5	0.862745	124	0.407692
CCL5	0.00276077	0.422886	12	2.36471	19.7912	0.742424	21.9167	0.848366	226	0.365278
LCK	0.00394329	0.418719	12	2.38824	32.3701	0.454545	17.1667	0.845752	256	0.312121
SPP1	0.00475698	0.395349	12	2.52941	32.4391	0.530303	16.5	0.830065	184	0.336735
CDKN1A	0.01543	0.431472	11	2.31765	91.58	0.527273	15.7273	0.853595	1340	0.28595
CDK2	0.117883	0.427136	11	2.34118	64.6278	0.436364	13.0909	0.85098	5800	0.267161
CXCL2	0.00244171	0.412621	11	2.42353	19.4457	0.709091	21.8182	0.84183	198	0.382775
SREBF1	0.03094	0.408654	11	2.44706	207.655	0.327273	13.0909	0.839216	1404	0.265306
SLC2A4	0.00333817	0.420792	10	2.37647	26.7596	0.644444	20.5	0.847059	308	0.330645
PARP1	0.0336344	0.429293	9	2.32941	218.302	0.388889	17.5556	0.852288	1562	0.320988
CASP1	0.0243839	0.422886	9	2.36471	165.727	0.416667	22.1111	0.848366	1044	0.390873
BMP2	0.00246153	0.422886	9	2.36471	16.6605	0.5	18.6667	0.848366	194	0.316384
ABL1	0.00568196	0.416667	9	2.4	24.7228	0.583333	18	0.844444	430	0.346154
PRKCD	0.00118312	0.414634	9	2.41176	6.85292	0.583333	19	0.843137	100	0.351852
LPL	0.00188092	0.381166	9	2.62353	13.3557	0.583333	15.7778	0.819608	134	0.358586
BMP4	0.00221094	0.406699	8	2.45882	13.0521	0.535714	18	0.837908	126	0.346154
RPS6KB1	0.00334741	0.404762	8	2.47059	47.4034	0.571429	19.875	0.836601	174	0.395
VEGFC	0.00504112	0.393519	8	2.54118	69.9408	0.5	19.375	0.828758	442	0.365566
PPARGC1A	0.0031633	0.376106	8	2.65882	16.246	0.607143	13.5	0.815686	200	0.375
BTK	0.00183454	0.386364	7	2.58824	15.0268	0.380952	18.5714	0.823529	92	0.379009
FABP4	0.00245244	0.381166	7	2.62353	19.0302	0.714286	17	0.819608	174	0.361702
BCL2	0.00052756	0.391705	6	2.55294	3.99508	0.733333	19.6667	0.827451	32	0.437037
TNFRSF11B	0.00116482	0.377778	6	2.64706	7.51248	0.666667	18	0.816993	86	0.391304
CDK1	0.0149745	0.361702	6	2.76471	6.07357	0.666667	9.33333	0.803922	1154	0.373333
FADD	0.00051699	0.391705	5	2.55294	3.30423	0.7	20.8	0.827451	44	0.442553
COL1A1	0.00072141	0.384615	5	2.6	4.72861	0.4	21.4	0.822222	40	0.441667
ACP5	0.00024706	0.360169	5	2.77647	1.43065	0.8	14.2	0.802614	14	0.383784
CTSK	0.00027514	0.357143	5	2.8	1.63118	0.7	14.4	0.8	12	0.411429
CCNE1	9.549e-05	0.35124	5	2.84706	0.681818	0.9	11.4	0.794771	4	0.475
ADORA1	0	0.348361	5	2.87059	0	1	15.6	0.792157	0	0.503226
CHEK1	0.00722167	0.328185	5	3.04706	6.44848	0.5	8.2	0.772549	314	0.470588
PTPN2	0.00275831	0.377778	4	2.64706		0.166667	14.75	0.816993	172	0.375
BAX	0	0.374449	4	2.67059	0	1	18	0.814379	0	0.461538
LGALS1	0	0.366379	4	2.72941	0	1	18.5	0.807843	0	0.440476
TACR1	0.00278869	0.360169	4	2.77647	0.314516	0.5	16.75	0.802614	148	0.440789
PCK1	0.00021099	0.337302	4	2.96471	1.50644	0.666667	11.75	0.781699	12	0.451923
TYMS	0.112045	0.315985	4	3.16471		0.5	6.25	0.759477	5400	0.428571
NOX4	0.00367931	0.376106	3	2.65882	10.7462	0.333333	18	0.815686	164	0.441667
CYBA	0.024039	0.35124	3	2.84706	4.21697	0	11.6667	0.794771	692	0.355556
UCP2	0	0.341365	3	2.92941	0	1	19.3333	0.785621	0	0.716049
FASN	0.00212746	0.338645	3	2.95294	14.81	0.666667	11.6667	0.783007	160	0.448718
CSF1R	0.00028521	0.329457	3	3.03529	0	0.333333	11.3333	0.773856	10	0.458333
DHFR	0.0907563	0.246377	3	4.05882		0.333333	3	0.660131	4328	0.444444
AKR1B1	0.0464986	0.200472	3	4.98824		0.333333	2.33333	0.556863	2172	0.5
HP	0	0.367965	2	2.71765	0	1	35.5	0.80915	0	0.806818
IRAK4	0	0.345528	2	2.89412		1	21	0.789542	0	0.677419
TACR2	0	0.310219	2	3.22353		1	10.5	0.752941	0	0.583333
ACACA	0	0.292096	2	3.42353	0	1	7	0.730719	0	0.636364
CBR1	0	0.199531	2	5.01176		1	3	0.554248	0	0.75
ALDH2	0.0235294	0.167984	2	5.95294		0	2	0.449673	1088	0.5
CYP2C9	0	0.326923	1	3.05882	0	0	20	0.771242	0	0
TDP1	0	0.301418	1	3.31765	0	0	9	0.742484	0	0
CTSB	0	0.298246	1	3.35294	0	0	9	0.738562	0	0
GAA	0	0.260736	1	3.83529		0	3	0.684967	0	0
MAOA	0	0.144068	1	6.94118		0	2	0.339869	0	0
